# Supplementary material for: Synthesis of low glass transition temperature worms comprising a poly(styrene-stat-n-butyl acrylate) core segment via polymerization-induced self-assembly in RAFT aqueous emulsion polymerization
Source: Royal Society of Chemistry journal article supplement (doi:10.1039/d1py01636a), 2022-01-01
Supplement: d1py01636a1.pdf [file d1py01636a1.pdf]

## Supporting Information

### Synthesis of low glass transition temperature worms comprising a poly(styrene-*stat*-*n*-butyl acrylate) core segment via polymerization-induced self-assembly in RAFT aqueous emulsion polymerization

Hyun Jin Kim<sup>1</sup>, Fumi Ishizuka<sup>1</sup>, Rhiannon P. Kuchel<sup>2</sup>, Shunsuke Chatani<sup>3</sup>, Hiroshi Niino<sup>3</sup>, Per B. Zetterlund<sup>1,\*</sup>

<sup>1</sup> Cluster for Advanced Macromolecular Design (CAMD), School of Chemical Engineering, The University of New South Wales, Sydney, NSW, 2052, Australia.

<sup>2</sup> Electron Microscope Unit, The University of New South Wales, Sydney, NSW, 2052, Australia.

<sup>3</sup> Hiroshima R&D Center, Mitsubishi Chemical Corporation, 20-1 Miyuki-cho, Otake, Hiroshima 739-0693, Japan.

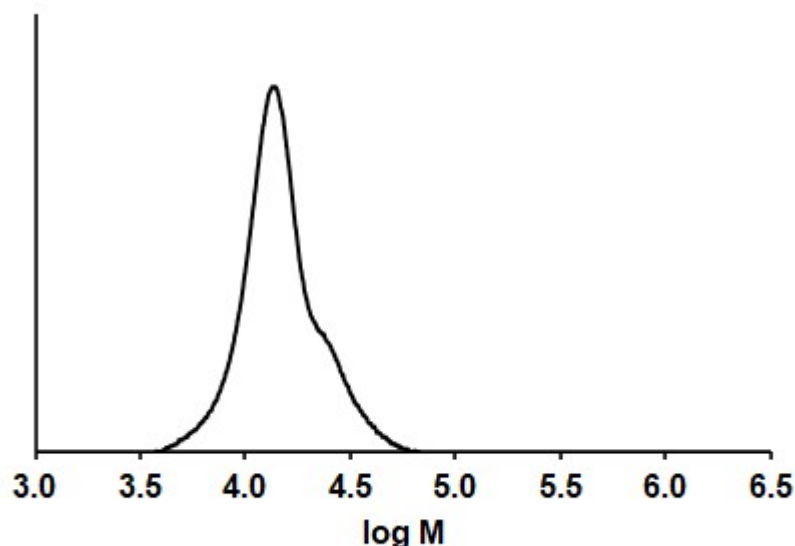

**Fig. S1** Molecular weight distributions ( $w(\log M)$  vs.  $\log M$ ) of P(AA-*stat*-PEGA)-TTC macroRAFT agent ( $M_n = 13,400$  g/mol;  $D = 1.20$ ).

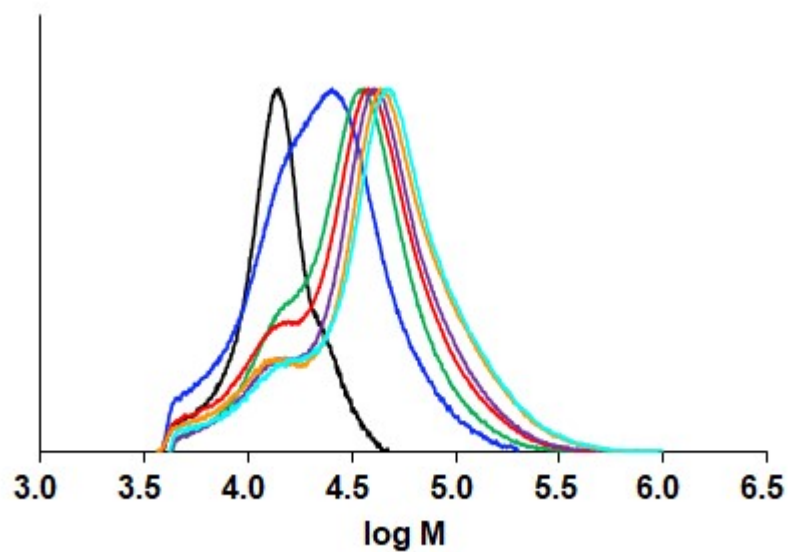

**Fig. S2** Molecular weight distributions ( $w(\log M)$  vs.  $\log M$ ) of RAFT aqueous emulsion polymerization of styrene and *n*BA in the presence of P(AA-*stat*-PEGA)-TTC macroRAFT agent with different  $[\text{hydrophobic monomer}]_0/[\text{macroRAFT}]_0$  (macroRAFT agent,  $[\text{hydrophobic monomer}]_0/[\text{macroRAFT}]_0 = 50$  (B-1), 100 (B-2), 130 (B-3), 150 (B-4), 170 (B-5), 200 (B-6) from left to right) (Table 2).

**Table S1** Experimental conditions and results of RAFT aqueous emulsion polymerization of styrene and *n*BA in the presence of P(AA-*stat*-PEGA) macroRAFT agent at 80 °C for 4 h; pH 5, molar ratio AA/PEGA = 50/50, styrene/*n*BA = 70/30, [macroRAFT]<sub>0</sub> = 6.2 mmol/L, [NaHCO<sub>3</sub>]<sub>0</sub>/[ACPA]<sub>0</sub> = 3.5.

| #                                                        | Crosslinker | [M] <sub>0</sub> /[crosslinker] <sub>0</sub> /[RAFT] <sub>0</sub> | Conv. <sup>a</sup><br>(%) | <i>M</i> <sub>n,th</sub> <sup>b</sup><br>(g/mol) | Solids<br>content <sup>c</sup><br>(%) |
|----------------------------------------------------------|-------------|-------------------------------------------------------------------|---------------------------|--------------------------------------------------|---------------------------------------|
| <i>Entries C-x and D-x: crosslinker added at t = 0 h</i> |             |                                                                   |                           |                                                  |                                       |
| C-1                                                      | PEGDA       | 100/1/1                                                           | 73 <sup>a</sup>           | 20,200 <sup>b</sup>                              | 12.6                                  |
| C-2                                                      | PEGDA       | 100/2.5/1                                                         | 98 <sup>a</sup>           | 23,100 <sup>b</sup>                              | 12.7                                  |
| D-1                                                      | EGDA        | 100/0.5/1                                                         | 92                        | 22,000                                           | 12.7                                  |
| D-2                                                      | EGDA        | 100/1/1                                                           | 89                        | 22,800                                           | 12.5                                  |
| D-3                                                      | EGDA        | 100/10/1                                                          | 89                        | 23,300                                           | 13.4                                  |
| <i>Entries E-x and F-x: crosslinker added at t = 2 h</i> |             |                                                                   |                           |                                                  |                                       |
| E-1                                                      | PEGDA       | 100/1/1                                                           | 69 <sup>a</sup>           | 19,800 <sup>b</sup>                              | 12.6                                  |
| E-2                                                      | PEGDA       | 100/10/1                                                          | 100 <sup>a</sup>          | 25,500 <sup>b</sup>                              | 13.7                                  |
| F-1                                                      | EGDA        | 100/3/1                                                           | 92                        | 22,100                                           | 12.6                                  |
| F-2                                                      | EGDA        | 100/5/1                                                           | 93                        | 23,100                                           | 12.9                                  |
| F-3                                                      | EGDA        | 100/10/1                                                          | 100                       | 24,700                                           | 13.3                                  |

<sup>a</sup> Monomer conversion by gravimetry. Note that PEGDA was non-volatile and was excluded from calculation of monomer conversion determined by gravimetry.

<sup>b</sup> Theoretical *M*<sub>n,th</sub> calculated using monomer conversion obtained from gravimetry via eqn (S1).

<sup>c</sup> Solids content in wt% based on total weight.

The theoretical number-average molecular weight (*M*<sub>n,th</sub>) was determined by eqn (S1):

$$M_{n,th} = M_{\text{macroRAFT}} + \frac{(X_{\text{conv}} \cdot [\text{styrene}]_0 \cdot M_S) + (X_{\text{conv}} \cdot [n\text{BA}]_0 \cdot M_{n\text{BA}}) + (X_{\text{conv}} \cdot [\text{EGDA}]_0 \cdot M_{\text{EGDA}})}{[\text{macroRAFT}]_0} \quad (\text{S1})$$

where *M*<sub>macroRAFT</sub>, *M*<sub>S</sub>, *M*<sub>*n*BA</sub>, *M*<sub>EGDA</sub> are the molar masses of macroRAFT agent, styrene, *n*BA, and EGDA, respectively, [macroRAFT]<sub>0</sub>, [styrene]<sub>0</sub>, [*n*BA]<sub>0</sub>, [EGDA]<sub>0</sub> are the initial concentrations of macroRAFT agent, styrene, *n*BA, and EGDA respectively, and *X*<sub>conv</sub> denotes total monomer conversion determined by gravimetry.

**Table S2** Experimental conditions and results of RAFT aqueous emulsion polymerization of styrene and *n*BA in the presence of P(AA-*stat*-PEGA) macroRAFT agent at 80 °C, EGDA added at  $t = 2$  h; pH 5, molar ratio AA/PEGA = 50/50, styrene/*n*BA = 20/80, EGDA/macroRAFT = 5/1, [macroRAFT]<sub>0</sub> = 6.2 mmol/L, [NaHCO<sub>3</sub>]<sub>0</sub>/[ACPA]<sub>0</sub> = 3.5.

| #   | DP  | $t$<br>(h) | Conv. <sup>a</sup><br>(%) | $M_{n,th}^b$<br>(g/mol) | Solids<br>content <sup>c</sup><br>(%) |
|-----|-----|------------|---------------------------|-------------------------|---------------------------------------|
| G-1 | 80  | 4          | 100                       | 22,300                  | 12.2                                  |
| G-2 | 100 | 4          | 100                       | 24,600                  | 13.4                                  |
| G-3 | 115 | 4          | 98                        | 26,300                  | 14.2                                  |
| G-4 | 130 | 4          | 100                       | 28,800                  | 15.2                                  |
| G-5 | 150 | 4          | 100                       | 30,800                  | 16.1                                  |
| G-6 | 180 | 4          | 100                       | 34,500                  | 17.9                                  |
| G-7 | 200 | 4          | 96                        | 35,900                  | 18.7                                  |
| G-8 | 250 | 4          | 94                        | 41,200                  | 21.1                                  |
| G-9 | 300 | 4          | 93                        | 46,600                  | 23.5                                  |

<sup>a</sup> Monomer conversion by gravimetry.

<sup>b</sup> Theoretical  $M_{n,th}$  calculated using monomer conversion obtained from gravimetry via eqn (S1).

<sup>c</sup> Solids content in wt% based on total weight.

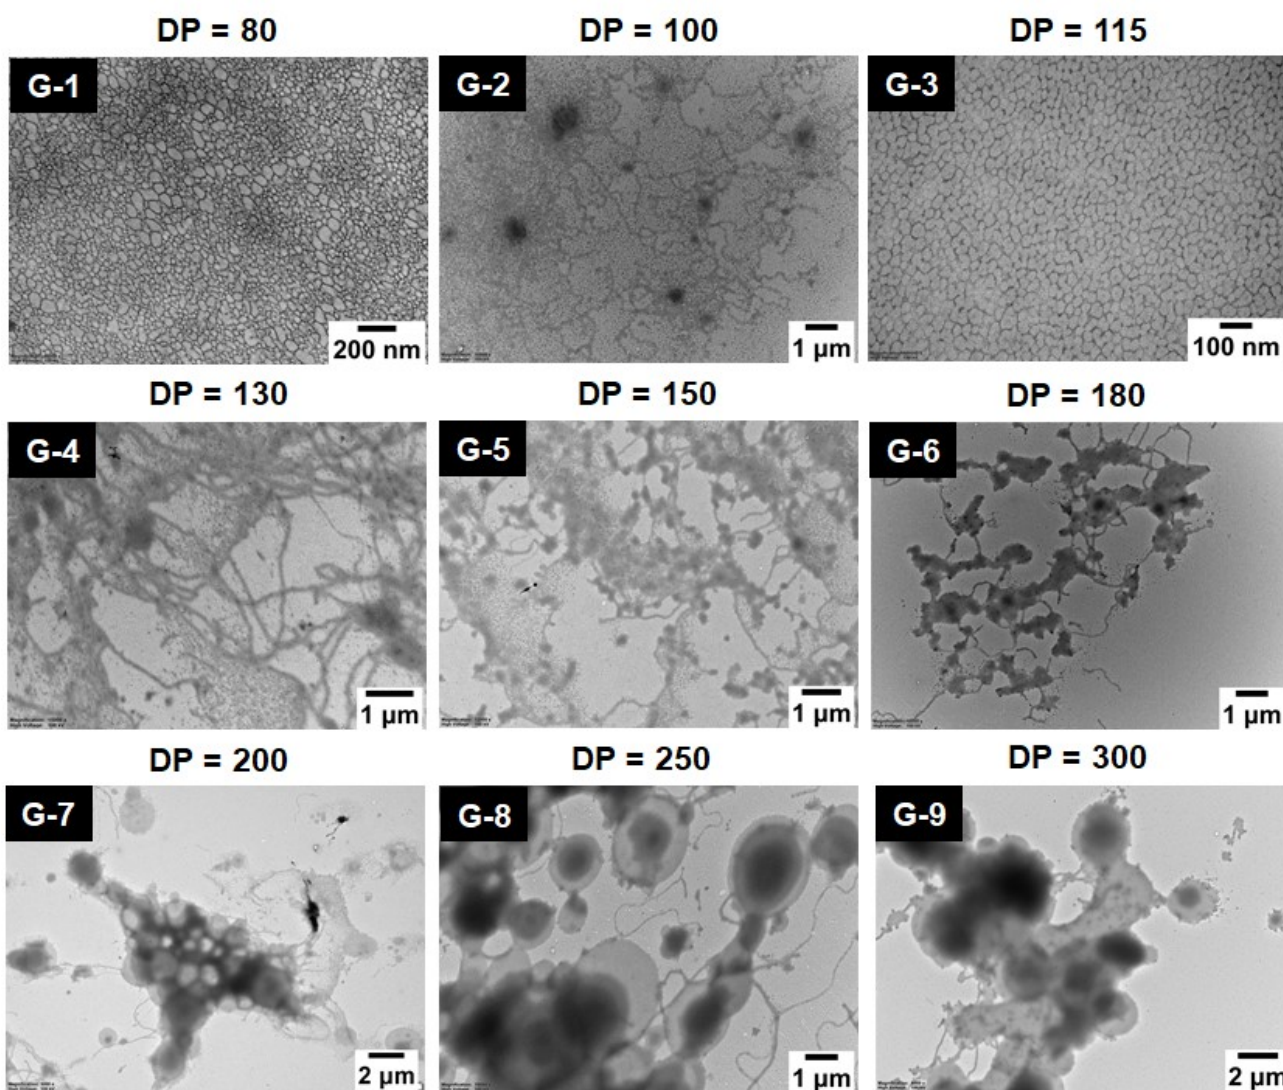

**Fig. S3** TEM images of nanoparticles synthesized via RAFT aqueous emulsion polymerization of styrene and *n*BA ( $[\text{styrene}]_0/[\text{nBA}]_0 = 20/80$ , solids content varied from 12.2% to 23.5%) in the presence of P(AA-*stat*-PEGA)-TTC macroRAFT agent at pH 5 with EGDA ( $[\text{EGDA}]_0/[\text{macroRAFT}]_0 = 5/1$ ) after 2 h of the polymerization with different  $[\text{hydrophobic monomer}]_0/[\text{macroRAFT}]_0$  ( $[\text{hydrophobic monomer}]_0/[\text{macroRAFT}]_0 = 80$  (G-1), 100 (G-2), 115 (G-3), 130 (G-4), 150 (G-5), 180 (G-6), 200 (G-7), 250 (G-8), 300 (G-9)). Scale bars: G-1 = 200 nm, G-2 = 1  $\mu\text{m}$ , G-3 = 100 nm, G-4 = 1  $\mu\text{m}$ , G-5 = 1  $\mu\text{m}$ , G-6 = 1  $\mu\text{m}$ , G-7 = 2  $\mu\text{m}$ , G-8 = 1  $\mu\text{m}$ , G-9 = 2  $\mu\text{m}$ .

**Table S3** Experimental conditions and results of RAFT aqueous emulsion polymerization of styrene and *n*BA in the presence of P(AA-*stat*-PEGA) macroRAFT agent at 80 °C for 4 h, EGDA added at  $t = 2$  h; pH 5, molar ratio AA/PEGA = 50/50, styrene/*n*BA = 20/80, EGDA/macroRAFT = 5/1, [macroRAFT]<sub>0</sub> = 6.2 mmol/L, [NaHCO<sub>3</sub>]<sub>0</sub>/[ACPA]<sub>0</sub> = 3.5.

| #   | DP  | $t$<br>(h) | Conv. <sup>a</sup><br>(%) | $M_{n,th}^b$<br>(g/mol) | Solids<br>content <sup>c</sup><br>(%) |
|-----|-----|------------|---------------------------|-------------------------|---------------------------------------|
| H-1 | 130 | 4          | 100                       | 28,800                  | 15.2                                  |
| H-2 | 130 | 4          | 100                       | 28,300                  | 24.7                                  |
| H-3 | 130 | 4          | 91                        | 26,800                  | 32.7                                  |

<sup>a</sup> Monomer conversion by gravimetry.

<sup>b</sup> Theoretical  $M_{n,th}$  calculated using monomer conversion obtained from gravimetry via eqn (S1).

<sup>c</sup> Solids content in wt% based on total weight.

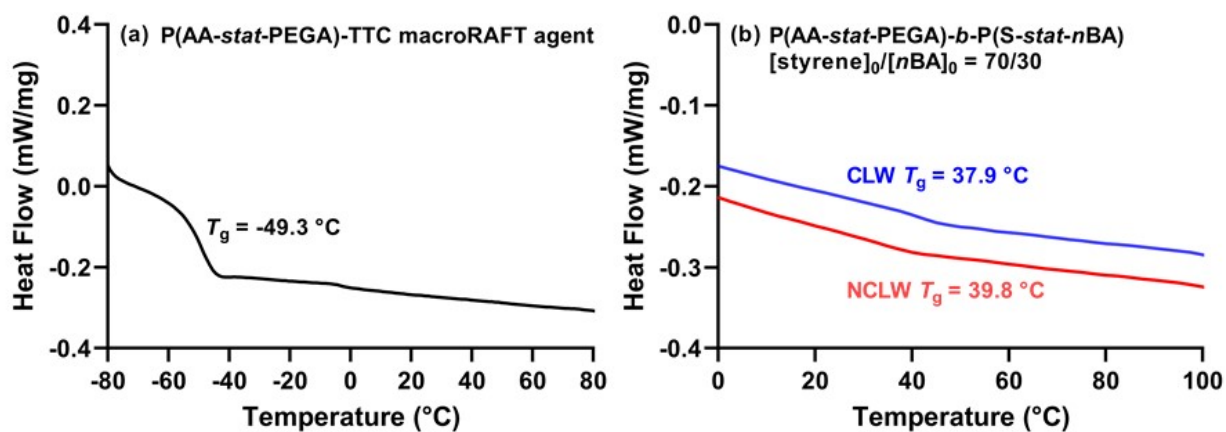

**Fig. S4** DSC traces of (a) P(AA-*stat*-PEGA)-TTC macroRAFT agent, (b) P(AA-*stat*-PEGA)-*b*-P(S-*stat*-*n*BA) non-crosslinked worms (NCLW) and crosslinked worms (CLW) ([styrene]<sub>0</sub>/[nBA]<sub>0</sub> = 70/30).
